# Supplementary material for: The DNA repair protein SHPRH is a nucleosome-stimulated ATPase and a nucleosome-E3 ubiquitin ligase
Source: Epigenetics Chromatin. 2019 Aug 21;12:52. doi: 10.1186/s13072-019-0294-5 (PMC6702750; doi:10.1186/s13072-019-0294-5)
Supplement: Supplementary file 2 — Additional file 2. Mass spectrometry analyses of Ub chains (Ub-Ub linkages) from reactions using SHPRH, UBE2D1 and nucleosome substrates that were either assembled using HeLa or recombinant histones. [file 13072_2019_294_MOESM2_ESM.xls]

## Sheet: Reaction HeLa nucleosomes
Analysis of Ub chains in reaction using HeLa nucleosomes as substrates
Checked	Confidence	Annotated Sequence	Modifications	Modifications in Master Proteins	# Protein Groups	# Proteins	# PSMs	Master Protein Accessions	Positions in Master Proteins	# Missed Cleavages	Theo. MH+ [Da]	# Razor Quan Results	Abundance: F1: Sample	Quan Info	Found in Sample: [S1] F1: Sample	Confidence (by Search Engine): MS Amanda 2.0	Confidence (by Search Engine): Sequest HT	XCorr (by Search Engine): Sequest HT	Amanda Score (by Search Engine): MS Amanda 2.0	Top Apex RT [min]	Sequence in Protein	Positions in Protein	Peptide Group Modifications in Protein	Quan Usage
FALSE	High	[N].IQKESTLHLVLR.[L]	1xGG [K3]		1	1	2	Ubiquitin	Ubiquitin [61-72]	2	1550.9	1	1.27551e+06		High	High	High	2.8	265.23	35.38	N.IQKESTLHLVLR.L	[61-72]		Used
FALSE	High	[L].SDYNIQKESTLHLVLR.[L]	1xGG [K7]		1	1	2	Ubiquitin	Ubiquitin [57-72]	1	2030.07	0	1580846		High	High	High	3.06	312.29	39.22	L.SDYNIQKESTLHLVLR.L	[57-72]		Used
FALSE	High	[E].PSDTIENVKAKIQDK.[E]	1xGG [K]		1	1	3	Ubiquitin	Ubiquitin [19-33]	2	1799.95	0	56896868		High	Medium	High	2.84	167.96	42.98	E.PSDTIENVKAKIQDK.E	[19-33]		Used
FALSE	High	[Y].NIQKESTLHLVLR.[L]	1xGG [K4]		1	1	2	Ubiquitin	Ubiquitin [60-72]	2	1664.94	0	2.74826e+06		High	High	High	3.15	261.51	35.58	Y.NIQKESTLHLVLR.L	[60-72]		Used
FALSE	High	[-].MQIFVKTLTGK.[T]	1xGG [K6]		1	1	2	Ubiquitin	Ubiquitin [1-11]	1	1379.77	0		No Quan Values	High	High	Medium	1.41	229.63		-.MQIFVKTLTGK.T	[1-11]		Not Used
FALSE	High	[T].ITLEVEPSDTIENVK.[A]			1	1	2	Ubiquitin	Ubiquitin [13-27]	0	1686.88	0	225580		High	High	High	3.83	363.83	40.01	T.ITLEVEPSDTIENVK.A	[13-27]		Used
FALSE	High	[K].IQDKEGIPPDQQR.[L]	1xGG [K4]		1	1	8	Ubiquitin	Ubiquitin [30-42]	1	1637.82	0	138254		High	High	High	3.18	306.33	30.29	K.IQDKEGIPPDQQR.L	[30-42]		Used
FALSE	High	[K].IQDKEGIPPDQQR.[L]			1	1	12	Ubiquitin	Ubiquitin [30-42]	1	1523.78	0	211700		High	High	High	3.78	358.75	29.9	K.IQDKEGIPPDQQR.L	[30-42]		Used
FALSE	High	[Y].NIQKESTLHLVLR.[L]			1	1	2	Ubiquitin	Ubiquitin [60-72]	2	1550.9	0		No Quan Values	High	High	High	2.78	260.57	35.38	Y.NIQKESTLHLVLR.L	[60-72]		Not Used
FALSE	High	[I].TLEVEPSDTIENVK.[A]			1	1	2	Ubiquitin	Ubiquitin [14-27]	0	1573.8	0	1.12729e+06		High	High	High	3.27	321.91	37.6	I.TLEVEPSDTIENVK.A	[14-27]		Used
FALSE	High	[F].VKTLTGKTITLEVEPSDTIENVK.[A]	2xGG [K2; K7]		1	1	4	Ubiquitin	Ubiquitin [5-27]	2	2743.47	0	531281		High	High	High	6.25	521.37	38.59	F.VKTLTGKTITLEVEPSDTIENVK.A	[5-27]		Used
FALSE	High	[E].VEPSDTIENVK.[A]			1	1	2	Ubiquitin	Ubiquitin [17-27]	0	1230.62	0	1.01116e+06		High	High	High	2.26	240.16	33.74	E.VEPSDTIENVK.A	[17-27]		Used
FALSE	High	[K].TITLEVEPSDTIENVK.[A]			1	1	24	Ubiquitin	Ubiquitin [12-27]	0	1787.93	0	2.03338e+08		High	High	High	3.83	393.81	40.22	K.TITLEVEPSDTIENVK.A	[12-27]		Used
FALSE	High	[K].TLTGKTITLEVEPSDTIENVK.[A]	1xGG [K5]		1	1	13	Ubiquitin	Ubiquitin [7-27]	1	2402.27	0	1.39669e+08		High	High	High	6.36	523.16	39.57	K.TLTGKTITLEVEPSDTIENVK.A	[7-27]		Used
FALSE	High	[R].TLSDYNIQKESTLHLVLRL.[R]	1xDeamidated [Q8]		1	1	4	Ubiquitin	Ubiquitin [55-73]	2	2244.22	0		No Quan Values	High	High	High	2.99	262.77	39.21	R.TLSDYNIQKESTLHLVLRL.R	[55-73]		Not Used
FALSE	High	[R].TLSDYNIQKESTLHLVLR.[L]	1xDeamidated [Q8]; 1xGG [K9]		1	1	2	Ubiquitin	Ubiquitin [55-72]	1	2245.18	0		Not Reliable	High	High	High	4.77	349.25		R.TLSDYNIQKESTLHLVLR.L	[55-72]		Not Used
FALSE	High	[R].TLSDYNIQKESTLHLVLR.[L]	1xGG [K9]		1	1	10	Ubiquitin	Ubiquitin [55-72]	1	2244.2	2	1.68498e+08		High	High	High	4.84	442.3	39.23	R.TLSDYNIQKESTLHLVLR.L	[55-72]		Used
FALSE	High	[R].TLSDYNIQKESTLH.[L]	1xDeamidated [Q8]; 1xGG [K9]		1	1	4	Ubiquitin	Ubiquitin [55-68]	1	1763.84	0		Not Reliable	High	High	High	2.34	264.36		R.TLSDYNIQKESTLH.L	[55-68]		Not Used
FALSE	High	[R].TLSDYNIQKESTLH.[L]	1xGG [K9]		1	1	4	Ubiquitin	Ubiquitin [55-68]	1	1762.86	0	16166971		High	High	High	2.61	209.43	34.56	R.TLSDYNIQKESTLH.L	[55-68]		Used
FALSE	High	[R].TLSDYNIQKESTL.[H]	1xGG [K9]		1	1	2	Ubiquitin	Ubiquitin [55-67]	1	1625.8	0	3.68394e+06		High	High	High	2.81	384.42	37.48	R.TLSDYNIQKESTL.H	[55-67]		Used
FALSE	High	[R].TLSDYNIQKEST.[L]	1xGG [K9]		1	1	2	Ubiquitin	Ubiquitin [55-66]	1	1512.72	0	311599		High	Medium	High	1.96	196.72	33.94	R.TLSDYNIQKEST.L	[55-66]		Used
FALSE	High	[R].TLSDYNIQKES.[T]	1xGG [K9]		1	1	2	Ubiquitin	Ubiquitin [55-65]	1	1411.67	0	4.42807e+06		High	Medium	High	1.94	150.5	33.69	R.TLSDYNIQKES.T	[55-65]		Used
FALSE	High	[R].TLSDYNIQK.[E]			1	1	25	Ubiquitin	Ubiquitin [55-63]	0	1081.55	0	6.84377e+07		High	Medium	High	2.13	177.94	32.7	R.TLSDYNIQK.E	[55-63]		Used
FALSE	High	[R].TLSDYNIQKESTLHL.[V]	1xGG [K9]		1	1	2	Ubiquitin	Ubiquitin [55-69]	1	1875.94	0		No Quan Values	High	High	Medium	1.64	215.88		R.TLSDYNIQKESTLHL.V	[55-69]		Not Used
FALSE	High	[K].EGIPPDQQR.[L]			1	1	12	Ubiquitin	Ubiquitin [34-42]	0	1039.52	0	1.13489e+06		High	High	High	2.06	225.53	30.29	K.EGIPPDQQR.L	[34-42]		Used
FALSE	High	[L].EVEPSDTIENVK.[A]			1	1	2	Ubiquitin	Ubiquitin [16-27]	2	1359.66	0	10770069		High	High	High	2.49	264.42	34.31	L.EVEPSDTIENVK.A	[16-27]		Used
FALSE	High	[L].EVEPSDTIENVK.[A]	1xDeamidated [N10]		1	1	2	Ubiquitin	Ubiquitin [16-27]	2	1360.65	0		No Quan Values	High	Medium	High	1.96	136.95		L.EVEPSDTIENVK.A	[16-27]		Not Used
FALSE	High	[I].FAGKQLEDGR.[T]	1xGG [K4]		1	1	4	Ubiquitin	Ubiquitin [45-54]	1	1234.62	0	2.2499e+07		High	High	High	1.93	243.13	35.86	I.FAGKQLEDGR.T	[45-54]		Used
FALSE	High	[A].GKQLEDGR.[T]	1xGG [K2]		1	1	2	Ubiquitin	Ubiquitin [47-54]	2	1016.51	0	950119		High	High	High	2.09	209.35	35.86	A.GKQLEDGR.T	[47-54]		Used
FALSE	High	[D].GRTLSDYNIQKESTLHLVLR.[L]			1	1	2	Ubiquitin	Ubiquitin [53-72]	2	2343.28	0	181848		High	High	High	4.39	367.19	37.9	D.GRTLSDYNIQKESTLHLVLR.L	[53-72]		Used
FALSE	High	[V].EPSDTIENVK.[A]			1	1	2	Ubiquitin	Ubiquitin [18-27]	2	1131.55	0		No Quan Values	High	Medium	High	2.01	190.18		V.EPSDTIENVK.A	[18-27]		Not Used
FALSE	High	[K].ESTLHLVLR.[L]			1	1	31	Ubiquitin	Ubiquitin [64-72]	0	1067.62	0	3.45884e+08		High	High	High	2.77	278.78	36.65	K.ESTLHLVLR.L	[64-72]		Used
FALSE	High	[R].LIFAGKQLEDGR.[T]	1xDeamidated [Q7]; 1xGG [K6]		1	1	2	Ubiquitin	Ubiquitin [43-54]	1	1461.77	0		Not Reliable	High	High	High	2.93	309.13		R.LIFAGKQLEDGR.T	[43-54]		Not Used
FALSE	High	[R].LIFAGKQLEDGR.[T]	1xGG [K6]		1	1	11	Ubiquitin	Ubiquitin [43-54]	1	1460.79	0	7.41034e+07		High	High	High	3.11	319.94	35.86	R.LIFAGKQLEDGR.T	[43-54]		Used
FALSE	High	[L].IFAGKQLEDGR.[T]	1xGG [K5]		1	1	3	Ubiquitin	Ubiquitin [44-54]	1	1347.7	0	3230496		High	High	High	2.86	208.2	35.86	L.IFAGKQLEDGR.T	[44-54]		Used
FALSE	High	[T].LEVEPSDTIENVK.[A]			1	1	2	Ubiquitin	Ubiquitin [15-27]	0	1472.75	0	539905		High	High	High	3.29	354.58	36.93	T.LEVEPSDTIENVK.A	[15-27]		Used
FALSE	Medium	[K].TLTGKTITL.[E]	1xGG [K5]		1	1	2	Ubiquitin	Ubiquitin [7-15]	1	1061.62	0	1.3644e+06		Medium	Medium	Medium	1.84	159.89	38.54	K.TLTGKTITL.E	[7-15]		Used
FALSE	Medium	[F].AGKQLEDGR.[T]	1xGG [K3]		1	1	2	Ubiquitin	Ubiquitin [46-54]	1	1087.55	0	2112572		Medium	Medium	Medium	1.85	184.74	35.85	F.AGKQLEDGR.T	[46-54]		Used
FALSE	Medium	[R].TLSDYNIQKE.[S]	1xGG [K9]		1	1	1	Ubiquitin	Ubiquitin [55-64]	1	1324.64	0		No Quan Values	Medium	Medium	Low	1.28	131.37		R.TLSDYNIQKE.S	[55-64]		Not Used
FALSE	Medium	[R].TLSDYNIQK.[E]	1xDeamidated [N6]		1	1	2	Ubiquitin	Ubiquitin [55-63]	0	1082.54	0	38899564		Medium	Medium	Medium	1.71	163.77	33.93	R.TLSDYNIQK.E	[55-63]		Used
FALSE	Medium	[I].TLEVEPSDTIENVKAK.[I]	1xDeamidated [N12]		1	1	1	Ubiquitin	Ubiquitin [14-29]	2	1773.91	0	443225		Medium	Low	Medium	1.77	90.11	39.95	I.TLEVEPSDTIENVKAK.I	[14-29]		Used
FALSE	Medium	[T].GKTITLEVEPSDTIENVK.[A]	1xGG [K2]		1	1	1	Ubiquitin	Ubiquitin [10-27]	1	2087.09	0		No Quan Values	Medium	Medium	Low	1.12	170.21		T.GKTITLEVEPSDTIENVK.A	[10-27]		Not Used
FALSE	Medium	[K].QLEDGRTLSDYNIQK.[E]			1	1	2	Ubiquitin	Ubiquitin [49-63]	1	1779.89	0		No Quan Values	Medium	Medium	Medium	1.9	127.7		K.QLEDGRTLSDYNIQK.E	[49-63]		Not Used

## Sheet: Reactions recombinant nucs.
Analysis of Ub chains in reaction using recombinant nucleosomes as substrates (1)
Checked	Confidence	Annotated Sequence	Modifications	Modifications in Master Proteins	Contaminant	# Protein Groups	# Proteins	# PSMs	Master Protein Accessions	Positions in Master Proteins	# Missed Cleavages	Theo. MH+ [Da]	# Razor Quan Results	Abundance: F1: Sample	Quan Info	Found in Sample: [S1] F1: Sample	Confidence (by Search Engine): MS Amanda 2.0	Confidence (by Search Engine): Sequest HT	XCorr (by Search Engine): Sequest HT	Amanda Score (by Search Engine): MS Amanda 2.0	Top Apex RT [min]
TRUE	High	[K].TITLEVEPSDTIENVK.[A]			FALSE	1	1	2	Ubiquitin	Ubiquitin [12-27]	0	1787.93	0		No Quan Values	High	High	Medium	2.3	270.1
TRUE	High	[L].SDYNIQKESTLHLVLR.[L]			FALSE	1	1	1	Ubiquitin	Ubiquitin [57-72]	1	1916.02	0	48690.3		High	n/a	High	4.05		39.1
TRUE	High	[K].IQDKEGIPPDQQR.[L]	1xGG [K4]		FALSE	1	1	2	Ubiquitin	Ubiquitin [30-42]	1	1637.82	0	20339.8		High	High	Low	2.36	209.17	29.95
TRUE	High	[K].TLTGKTITLEVEPSDTIENVK.[A]	1xGG [K5]		FALSE	1	1	4	Ubiquitin	Ubiquitin [7-27]	1	2402.27	0		No Quan Values	High	High	High	4.7	372.02
TRUE	High	[K].IQDKEGIPPDQQR.[L]			FALSE	1	1	10	Ubiquitin	Ubiquitin [30-42]	1	1523.78	0	90266.2		High	High	High	4.09	353.69	29.51
TRUE	High	[L].SDYNIQKESTLHLVLRLR.[G]			FALSE	1	1	1	Ubiquitin	Ubiquitin [57-74]	2	2185.21	0	109978		High	n/a	High	4.73		38.81
TRUE	High	[R].LIFAGKQLEDGR.[T]	1xGG [K6]		FALSE	1	1	2	Ubiquitin	Ubiquitin [43-54]	1	1460.79	0	1.32818e+06		High	High	High	3.28	292.07	36.49
TRUE	High	[R].LIFAGKQLEDGR.[T]	1xDeamidated [Q7]		FALSE	1	1	1	Ubiquitin	Ubiquitin [43-54]	1	1347.73	0		Not Reliable	High	n/a	High	3.29
TRUE	High	[-].MQIFVKTLTGKTITLEVEPSDTIENVK.[A]			FALSE	1	1	2	Ubiquitin	Ubiquitin [1-27]	2	3034.64	0		No Quan Values	High	High	High	4.69	441.38
TRUE	High	[R].LIFAGKQLEDGR.[T]			FALSE	1	1	2	Ubiquitin	Ubiquitin [43-54]	1	1346.74	0	5.89752e+06		High	High	High	3.67	311.38	36.19
TRUE	High	[R].TLSDYNIQKESTLHLVLR.[L]			FALSE	1	1	4	Ubiquitin	Ubiquitin [55-72]	1	2130.16	0	5978587		High	High	High	4.76	467.9	39.11
TRUE	High	[R].TLSDYNIQKESTLHLVLR.[L]	1xGG [K9]		FALSE	1	1	6	Ubiquitin	Ubiquitin [55-72]	1	2244.2	0	4.91338e+06		High	High	High	4.84	438.23	39.31
TRUE	High	[R].TLSDYNIQKESTLHLVLR.[L]	1xDeamidated [Q8]; 1xGG [K9]		FALSE	1	1	1	Ubiquitin	Ubiquitin [55-72]	1	2245.18	0		Not Reliable	High	n/a	High	4.61
TRUE	High	[K].TLTGKTITLEVEPSDTIENVK.[A]			FALSE	1	1	4	Ubiquitin	Ubiquitin [7-27]	1	2288.22	0	411789		High	High	High	5.81	574.16	39.34
TRUE	High	[K].ESTLHLVLR.[L]			FALSE	1	1	2	Ubiquitin	Ubiquitin [64-72]	0	1067.62	0	274946		High	High	Medium	2.94	271.29	37.33
TRUE	High	[K].AKIQDKEGIPPDQQR.[L]	1xGG [K]		FALSE	1	1	9	Ubiquitin	Ubiquitin [28-42]	2	1836.96	0	199434		High	High	High	4.24	383.83	29.29
TRUE	High	[K].AKIQDKEGIPPDQQR.[L]			FALSE	1	1	12	Ubiquitin	Ubiquitin [28-42]	2	1722.91	0	727480		High	High	High	4.49	410.39	28.85
TRUE	High	[R].TLSDYNIQK.[E]			FALSE	1	1	2	Ubiquitin	Ubiquitin [55-63]	0	1081.55	0	298425		High	High	Medium	2.18	173.47	33.21
TRUE	High	[-].MQIFVKTLTGK.[T]			FALSE	1	1	2	Ubiquitin	Ubiquitin [1-11]	1	1265.73	0		No Quan Values	High	High	Medium	3.06	272.79
TRUE	Medium	[K].IQDKEGIPPDQQR.[L]	1xDeamidated [Q]		FALSE	1	1	2	Ubiquitin	Ubiquitin [30-42]	1	1524.77	0		No Quan Values	Medium	n/a	Medium	3.73
TRUE	Medium	[-].MQIFVKTLTG.[K]			FALSE	1	1	1	Ubiquitin	Ubiquitin [1-10]	1	1137.63	0	135364		Medium	n/a	Medium	2.25		41.43
TRUE	Medium	[-].MQIFVKTLT.[G]			FALSE	1	1	1	Ubiquitin	Ubiquitin [1-9]	1	1080.61	0	23554.6		Medium	n/a	Medium	2.24		41.08
TRUE	Medium	[R].LIFAGKQLEDGR.[T]	1xDeamidated [Q7]; 1xGG [K6]		FALSE	1	1	1	Ubiquitin	Ubiquitin [43-54]	1	1461.77	0		No Quan Values	Medium	n/a	Medium	3.06
TRUE	Medium	[R].LIFAGKQLEDG.[R]			FALSE	1	1	1	Ubiquitin	Ubiquitin [43-53]	1	1190.64	0	81284.1		Medium	n/a	Medium	2.51		38.64
TRUE	Medium	[L].IFAGKQLEDGR.[T]			FALSE	1	1	1	Ubiquitin	Ubiquitin [44-54]	1	1233.66	0	290134		Medium	n/a	Medium	2.62		36.19
TRUE	Medium	[I].FAGKQLEDGR.[T]	1xGG [K4]		FALSE	1	1	1	Ubiquitin	Ubiquitin [45-54]	1	1234.62	0	324835		Medium	n/a	Medium	2.64		36.48
TRUE	Medium	[I].FAGKQLEDGR.[T]	1xDeamidated [Q5]		FALSE	1	1	1	Ubiquitin	Ubiquitin [45-54]	1	1121.56	0		No Quan Values	Medium	n/a	Medium	2.26
TRUE	Medium	[I].FAGKQLEDGR.[T]			FALSE	1	1	1	Ubiquitin	Ubiquitin [45-54]	1	1120.57	0	2861794		Medium	n/a	Medium	2.85		36.19
TRUE	Medium	[-].MQIFVKTLTGKTITLEVEPSD.[T]			FALSE	1	1	1	Ubiquitin	Ubiquitin [1-21]	2	2350.26	0	24649.3		Medium	n/a	Medium	3.68		44.76
TRUE	Medium	[K].AKIQDKEGIPPDQ.[Q]			FALSE	1	1	1	Ubiquitin	Ubiquitin [28-40]	2	1438.75	0	18468.9		Medium	n/a	Medium	2.25		30.44
Analysis of Ub chains in reaction using recombinant nucleosomes as substrates (2)
Checked	Confidence	Annotated Sequence	Modifications	Modifications in Master Proteins	Contaminant	# Protein Groups	# Proteins	# PSMs	Master Protein Accessions	Positions in Master Proteins	# Missed Cleavages	Theo. MH+ [Da]	# Razor Quan Results	Abundance: F1: Sample	Quan Info	Found in Sample: [S1] F1: Sample	Confidence (by Search Engine): MS Amanda 2.0	Confidence (by Search Engine): Sequest HT	XCorr (by Search Engine): Sequest HT	Amanda Score (by Search Engine): MS Amanda 2.0	Top Apex RT [min]
TRUE	High	[K].AKIQDKEGIPPDQQR.[L]			FALSE	1	1	6	Ubiquitin	Ubiquitin [28-42]	2	1722.91	0	129599		High	High	High	4.53	421.17	27.55
TRUE	High	[K].AKIQDKEGIPPDQQR.[L]	1xGG [K6]		FALSE	1	1	2	Ubiquitin	Ubiquitin [28-42]	2	1836.96	0	72032		High	High	High	3.44	312.94	27.56
TRUE	High	[I].FAGKQLEDGR.[T]			FALSE	1	1	1	Ubiquitin	Ubiquitin [45-54]	1	1120.57	0	2.66238e+06		High	n/a	High	3.12		34.2
TRUE	High	[R].LIFAGKQLEDGR.[T]			FALSE	1	1	4	Ubiquitin	Ubiquitin [43-54]	1	1346.74	0	6.14956e+06		High	High	High	3.76	315.34	34.22
TRUE	High	[R].LIFAGKQLEDGR.[T]	1xGG [K6]		FALSE	1	1	2	Ubiquitin	Ubiquitin [43-54]	1	1460.79	0	2584236		High	High	High	3.54	291.91	34.55
TRUE	High	[-].MQIFVKTLTGKTITLEVEPSD.[T]			FALSE	1	1	1	Ubiquitin	Ubiquitin [1-21]	2	2350.26	0	555243		High	n/a	High	4.39		42.77
TRUE	High	[-].MQIFVKTLTGKTITLEVEPSDTIENVK.[A]	1xGG [K11]		FALSE	1	1	2	Ubiquitin	Ubiquitin [1-27]	2	3148.68	0	224012		High	High	High	5.27	357.88	42.28
TRUE	High	[R].TLSDYNIQK.[E]			FALSE	1	1	2	Ubiquitin	Ubiquitin [55-63]	0	1081.55	0	81365.1		High	High	High	2.58	171.95	31.33
TRUE	High	[R].TLSDYNIQKESTLH.[L]			FALSE	1	1	1	Ubiquitin	Ubiquitin [55-68]	1	1648.82	0	641989		High	n/a	High	4.15		32.47
TRUE	High	[R].TLSDYNIQKESTLHLVLR.[L]	1xGG [K9]		FALSE	1	1	2	Ubiquitin	Ubiquitin [55-72]	1	2244.2	0	7484919		High	High	High	4.11	398.66	37.4
TRUE	High	[R].TLSDYNIQKESTLHLVLRL.[R]	1xDeamidated [Q8]		FALSE	1	1	1	Ubiquitin	Ubiquitin [55-73]	2	2244.22	0	421321		High	n/a	High	2.56		37.38
TRUE	High	[R].TLSDYNIQKESTLHLVLRLR.[G]			FALSE	1	1	2	Ubiquitin	Ubiquitin [55-74]	2	2399.34	0	298266		High	High	High	5.44	468.56	37.99
TRUE	Medium	[I].FAGKQLEDGR.[T]	1xGG [K4]		FALSE	1	1	1	Ubiquitin	Ubiquitin [45-54]	1	1234.62	0	441742		Medium	n/a	Medium	2.28		34.52
